# Supplementary material
Source: HighWire-hosted journal article supplement (https://adc.bmj.com/content/108/5/398)
Supplement: inline-supplementary-material-1 [file inline-supplementary-material-1.pdf]

Supplemental Table 1 Age at first reintervention

| Age (years) | Non-critical<br>aortic stenosis<br>(n=42) | Critical<br>aortic stenosis<br>(n=65) | <i>p</i>     |
|-------------|-------------------------------------------|---------------------------------------|--------------|
| <1          | 6                                         | 24                                    | <b>0.011</b> |
| 1– <5       | 2                                         | 3                                     | 0.97         |
| 5– <10      | 4                                         | 3                                     | 0.52         |
| 10– <15     | 2                                         | 5                                     | 0.55         |
| 15– <20     | 0                                         | 2                                     | NA           |

Indication for first reintervention; non-critical AS patients: stenosis n=10, combination stenosis and regurgitation n=3, other n=1 (resection of subaortic membrane); critical AS patients: stenosis n=20, regurgitation n=7, combination of stenosis and regurgitation n=3, other n=7 (conversion to univentricular palliation 1, heart transplant 1, PDA closure 2, ASD closure 1, exchange of homograft in pulmonary position 1)
