# Supplementary material
Source: HighWire-hosted journal article supplement (https://adc.bmj.com/content/108/5/398)
Supplement: inline-supplementary-material-2 [file inline-supplementary-material-2.pdf]

Supplemental table 2A Univariable and multivariable Cox proportional hazards model for risk of reintervention

|                                    | <b>All patients</b> |                  |               | <b>Non-critical AS</b> |               |               | <b>Critical AS</b> |                  |               |
|------------------------------------|---------------------|------------------|---------------|------------------------|---------------|---------------|--------------------|------------------|---------------|
|                                    | Univariable         | Multivariable    |               | Univariable            | Multivariable |               | Univariable        | Multivariable    |               |
|                                    | <i>p</i>            | <i>p</i>         | HR (CI 95%)   | <i>p</i>               | <i>p</i>      | HR (CI 95%)   | <i>p</i>           | <i>p</i>         | HR (CI 95%)   |
| <b>Gender, male/female</b>         | 0.9                 |                  |               | 0.55                   |               |               | 0.63               |                  |               |
| <b>Gestational age, weeks</b>      | <b>0.024</b>        | 0.41             | 0.9 (0.8–1.1) | 0.24                   |               |               | 0.45               |                  |               |
| <b>Birth weight</b>                | 0.54                |                  |               | 0.24                   |               |               | 0.58               |                  |               |
| <b>Duct dependent</b>              | <b>0.001</b>        | 0.11             | 2.1 (0.8–5.3) | NA                     |               |               | <b>0.052</b>       | 0.21             | 1.8 (0.7–4.8) |
| <b>Aortic annulus, z-score</b>     | <b>&lt;0.001</b>    | <b>0.024</b>     | 0.8 (0.6–1.0) | 0.32                   | 0.46          | 0.9 (0.6–1.3) | <b>0.002</b>       | <b>0.014</b>     | 0.7 (0.5–0.9) |
| <b>EFE</b>                         | <b>0.013</b>        | 0.52             | 0.7 (0.3–1.9) | NA                     |               |               | 0.42               |                  |               |
| <b>LVEDd, z-score</b>              | 0.56                |                  |               | 0.37                   |               |               | 0.86               |                  |               |
| <b>LVPWd, z-score</b>              | 0.30                |                  |               | 0.94                   |               |               | 0.48               |                  |               |
| <b>LVFS, %</b>                     | 0.11                | 0.63             | 1.0 (1.0–1.0) | 0.50                   | 0.17          | 1.1 (1.0–1.2) | 0.51               | 0.25             | 1.0 (0.9–1.0) |
| <b>Peak aortic gradient</b>        | 0.98                |                  |               | 0.69                   |               |               |                    |                  |               |
| <b>Residual peak gradient</b>      | <b>&lt;0.001</b>    | <b>&lt;0.001</b> | 1.0 (1.0–1.1) | <b>0.003</b>           | <b>0.026</b>  | 1.0 (1.0–1.1) | <b>&lt;0.001</b>   | <b>&lt;0.001</b> | 1.1 (1.0–1.1) |
| <b>Valve morphology:</b>           |                     |                  |               |                        |               |               |                    |                  |               |
| <b>Tricuspid (ref)</b>             |                     |                  |               |                        |               |               |                    |                  |               |
| <b>Bicuspid</b>                    | 0.58                |                  |               | 0.53                   |               |               | 0.54               |                  |               |
| <b>Unicuspid</b>                   | 0.19                |                  |               |                        |               |               | 0.33               |                  |               |
| <b>AR post first intervention:</b> |                     |                  |               |                        |               |               |                    |                  |               |
| <b>No AR (ref)</b>                 |                     |                  |               |                        |               |               |                    |                  |               |
| <b>AR grade 1</b>                  | 0.76                |                  |               | 0.57                   |               |               | 0.90               |                  |               |
| <b>AR grade 2 or 3*</b>            | 0.63                |                  |               | 0.77                   |               |               | 0.29               |                  |               |

Bold indicates *p*-values <0.1. Pre- and post-treatment aortic valve gradients were measured with echo Doppler. \*No patient had AR grade 4. (AS, aortic stenosis; HR, hazard ratio; CI, confidence interval; LVEDd, left ventricle end diastolic diameter; LVPWd, left ventricle posterior wall diameter; AR, Aortic regurgitation.)
