# Supplementary material
Source: HighWire-hosted journal article supplement (https://adc.bmj.com/content/108/5/398)
Supplement: inline-supplementary-material-4 [file inline-supplementary-material-4.pdf]

Supplemental table 3 Univariable and multivariable Cox proportional hazards model of all patients

|                                   | Death or transplant |               |                | Reintervention   |               |                      | Aortic valve replacement |               |                      |
|-----------------------------------|---------------------|---------------|----------------|------------------|---------------|----------------------|--------------------------|---------------|----------------------|
|                                   | Uni                 | Multivariable |                | Uni              | Multivariable |                      | Uni                      | Multivariable |                      |
|                                   | <i>p</i>            | <i>p</i>      | HR (CI 95%)    | <i>p</i>         | <i>p</i>      | HR (CI 95%)          | <i>p</i>                 | <i>p</i>      | HR (CI 95%)          |
| <b>Critical stenosis, yes/no</b>  | <b>0.10</b>         | 0.58          | 2.7 (0.1-42.6) | <b>0.007</b>     | 0.31          | 1.6 (0.6-4.1)        | <b>0.09</b>              | 0.56          | 0.7 (0.2-2.3)        |
| <b>Gender, male/female</b>        | 0.41                |               |                | 0.9              |               |                      | 0.44                     |               |                      |
| <b>Gestational age, weeks</b>     | 0.41                |               |                | <b>0.024</b>     | 0.55          | 0.6 (0.5-0.9)        | <b>0.024</b>             | 0.67          | 1.0 (0.8-1.2)        |
| <b>Birth weight</b>               | 0.86                |               |                | 0.54             |               |                      | 0.10                     |               |                      |
| <b>Aortic annulus, z-score</b>    | 0.1                 |               |                | <b>&lt;0.001</b> | <b>0.007</b>  | <b>0.6 (0.5-0.9)</b> | <b>0.024</b>             | <b>0.002</b>  | <b>0.5 (0.3-0.8)</b> |
| <b>EFE</b>                        | <b>0.025</b>        | 0.38          | 2.7 (0.3-24.9) | <b>0.013</b>     | 0.13          | 0.4 (0.1-1.3)        | <b>0.057</b>             | 0.26          | 0.4 (0.1-1.8)        |
| <b>LVEDd, z-score</b>             | 0.19                |               |                | 0.56             |               |                      | 0.69                     |               |                      |
| <b>LVPWd, z-score</b>             | 0.25                |               |                | 0.30             |               |                      | 0.15                     |               |                      |
| <b>Mean aortic gradient</b>       | <b>0.034</b>        | 0.4           | 1.0 (0.9-1.9)  | 0.55             |               |                      | 0.91                     |               |                      |
| <b>Residual mean gradient</b>     | 0.87                |               |                | <b>&lt;0.001</b> | 1.1           | 1.1 (1.0-1.1)        | <b>0.053</b>             | <b>0.03</b>   | <b>1.1 (1.0-1.1)</b> |
| <i>Valve morphology</i>           | 0.16                |               |                | 0.43             |               |                      | 0.48                     |               |                      |
| <b>Tricuspid (ref)</b>            |                     |               |                |                  |               |                      |                          |               |                      |
| <b>Bicuspid</b>                   | 0.058               |               |                | 0.58             |               |                      | 0.82                     |               |                      |
| <b>Unicuspid</b>                  | NA                  |               |                | 0.19             |               |                      | 0.24                     |               |                      |
| <i>AR post first intervention</i> |                     |               |                |                  |               |                      | 0.19                     |               |                      |
| <b>No AR (ref)</b>                |                     |               |                |                  |               |                      |                          |               |                      |
| <b>AR grade 1</b>                 | 0.84                |               |                | 0.76             |               |                      | 0.56                     |               |                      |
| <b>AR grade 2 or 3*</b>           | 0.87                |               |                | 0.63             |               |                      | 0.075                    |               |                      |

Bold indicates *p*-values <0.1. Pre- and post-treatment aortic valve gradients were measured with echo Doppler.

\*No patient had AR grade 4. (AS, aortic stenosis; HR, hazard ratio; CI, confidence interval; LVEDd, left ventricle end diastolic diameter; LVPWd, left ventricle posterior wall diameter; AR, Aortic regurgitation.)
